# Supplementary material for: Selective C–H Bond Cleavage with a High-Spin FeIV–Oxido Complex
Source: MDPI journal article supplement (doi:10.3390/molecules28124755), 2023-06-14
Supplement: s1 [file s1]

## Supporting Information for

### *Selective C–H Bond Cleavage by a High Spin Fe<sup>IV</sup>–Oxido Complex*

Chen Sun, Jennifer L. Jaimes, Alec H. Follmer, Joseph W. Ziller, and A.S. Borovik\*

#### Table of Contents

|                                                                                                                                                                                     |    |
|-------------------------------------------------------------------------------------------------------------------------------------------------------------------------------------|----|
| Figure S1. Zoomed in electronic absorption spectrum of [Fe <sup>IV</sup> pop(O)] <sup>−</sup> .                                                                                     | S2 |
| Figure S2. Electronic absorption spectrum of the reaction of [Fe <sup>IV</sup> pop(O)] <sup>−</sup> with BzOH and the corresponding pseudo first-order kinetic plots.               | S2 |
| Figure S3. Plot of $k_{\text{obs}}$ vs. the concentration of BzOH.                                                                                                                  | S3 |
| Figure S4. Plot of $k_{\text{obs}}$ vs. the concentration of [Fe <sup>IV</sup> pop(O)] <sup>−</sup> .                                                                               | S3 |
| Figure S5. Plot of $k_{\text{obs}}$ vs. the concentration of 4-R-BzOH and the corresponding Hammett plot.                                                                           | S4 |
| Figure S6. GCMS data for the reaction of [Fe <sup>IV</sup> pop(O)] <sup>−</sup> with BzOH (1:1).                                                                                    | S4 |
| Figure S7. <sup>1</sup> H NMR spectra comparing benzaldehyde to the extracted organic S4 product from the reaction of [Fe <sup>IV</sup> pop(O)] <sup>−</sup> with and without BzOH. | S5 |
| Figure S8. Plot of $k_{\text{obs}}$ vs. the concentration of BzOMe.                                                                                                                 | S5 |
| Figure S9. Plot of $k_{\text{obs}}$ vs. the concentration of BzOH using either [Fe <sup>IV</sup> pop(O)] <sup>−</sup> or [Fe <sup>IV</sup> poat(O)] <sup>−</sup> as the oxidant.    | S6 |
| Scheme S1. Expression for the proposed pre-equilibrium between [Fe <sup>IV</sup> pop(O)] <sup>−</sup> and substrate.                                                                | S6 |
| Table S1. Second order rate constants and the corresponding substituent constant for <i>para</i> -substituted benzyl alcohols.                                                      | S7 |
| Table S2. Crystallographic Information for {K[Fe <sup>II</sup> pop(OH <sub>2</sub> )]} <sub>2</sub> .                                                                               | S7 |

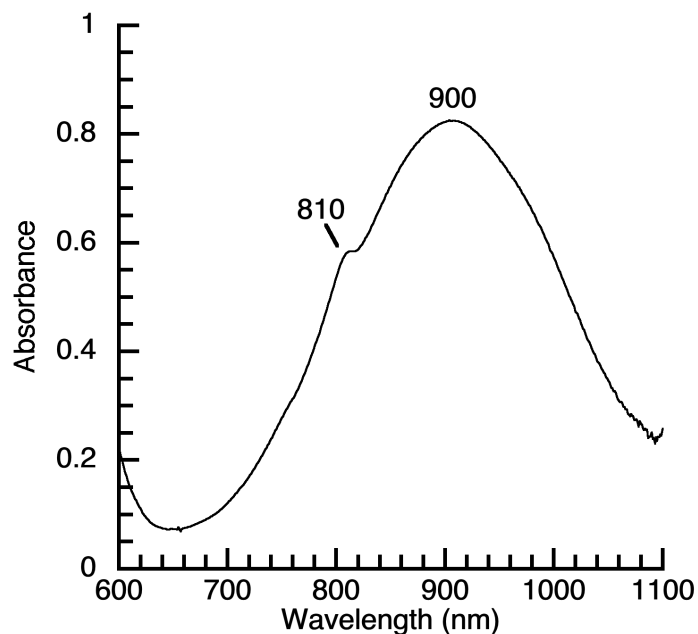

Figure S1. Electronic absorption spectrum of  $[\text{Fe}^{\text{IV}}\text{pop}(\text{O})]^-$  generated using 9.23 mM  $\text{K}[\text{Fe}^{\text{II}}\text{pop}(\text{OH}_2)]$  in the presence of 2.08 equiv of 18c6 + 1.06 equiv of IBX-*i*Pr in DMF:THF at  $-80^\circ\text{C}$ , highlighting the low-energy region.

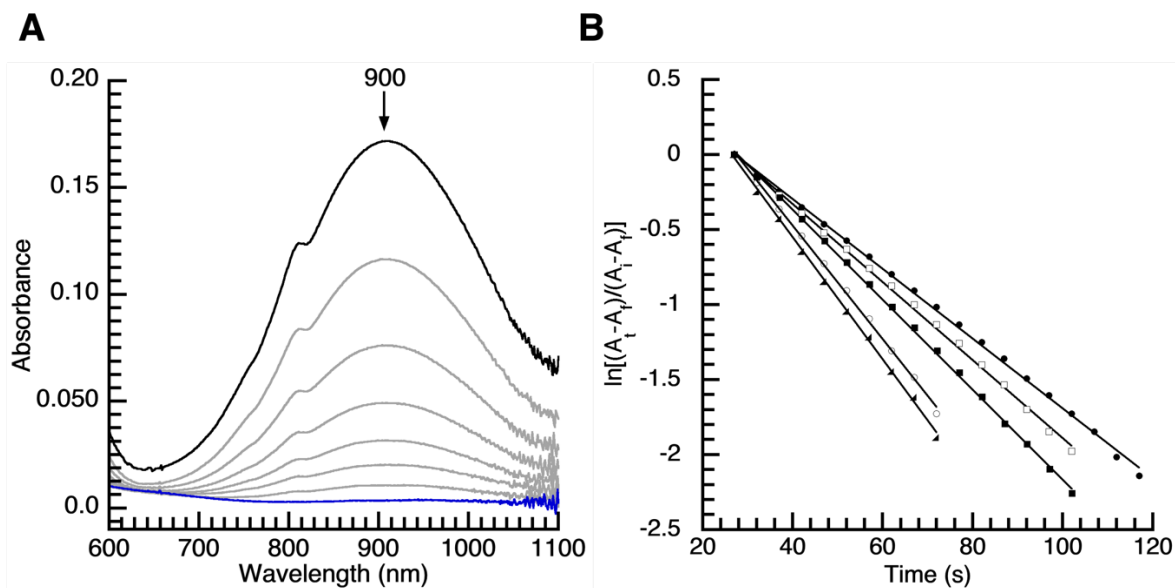

Figure S2. (A) Electronic absorption spectrum showing the disappearance of the 900 nm  $d-d$  band from the reaction of  $[\text{Fe}^{\text{IV}}\text{pop}(\text{O})]^-$  (1.9 mM) and BzOH under pseudo first-order rate conditions in DMF at  $-20^\circ\text{C}$ . (B) The corresponding plot of  $\ln\left(\frac{A_t - A_f}{A_i - A_f}\right)$  vs. time associated with the disappearance of the 900 nm  $d-d$  band for different concentrations of BzOH.

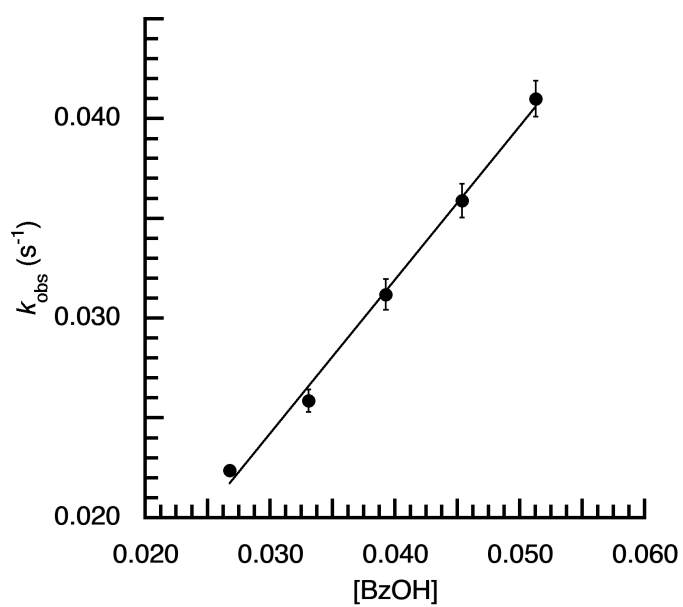

Figure S3. Plot of  $k_{\text{obs}}$  vs. the concentration of benzyl alcohol in DMF at  $-20\text{ }^{\circ}\text{C}$ .

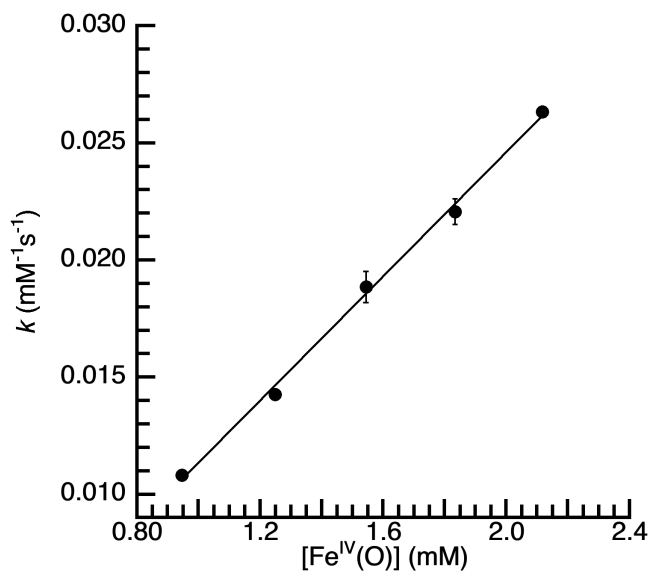

Figure S4. Plot of  $k$  vs. the concentration of  $[\text{Fe}^{\text{IV}}\text{pop}(\text{O})]^{-}$  in DMF at  $-20\text{ }^{\circ}\text{C}$ .

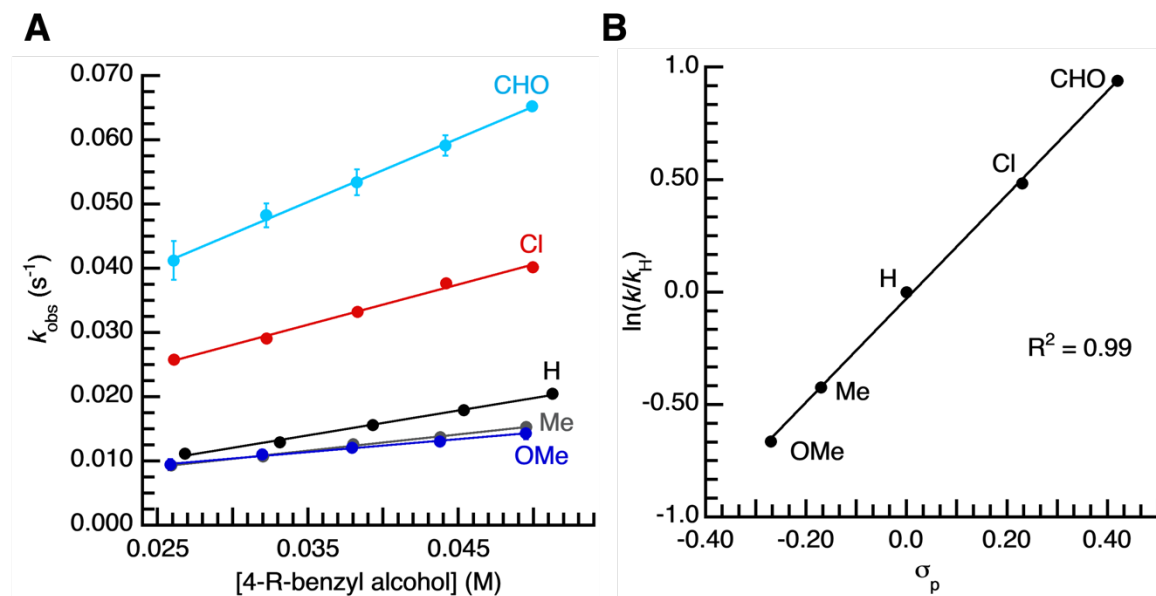

Figure S5: (A) Plot of  $k_{\text{obs}}$  vs. the concentration of 4-R-BzOH in DMF at  $-20\text{ }^{\circ}\text{C}$  and (B) the corresponding Hammett plot.

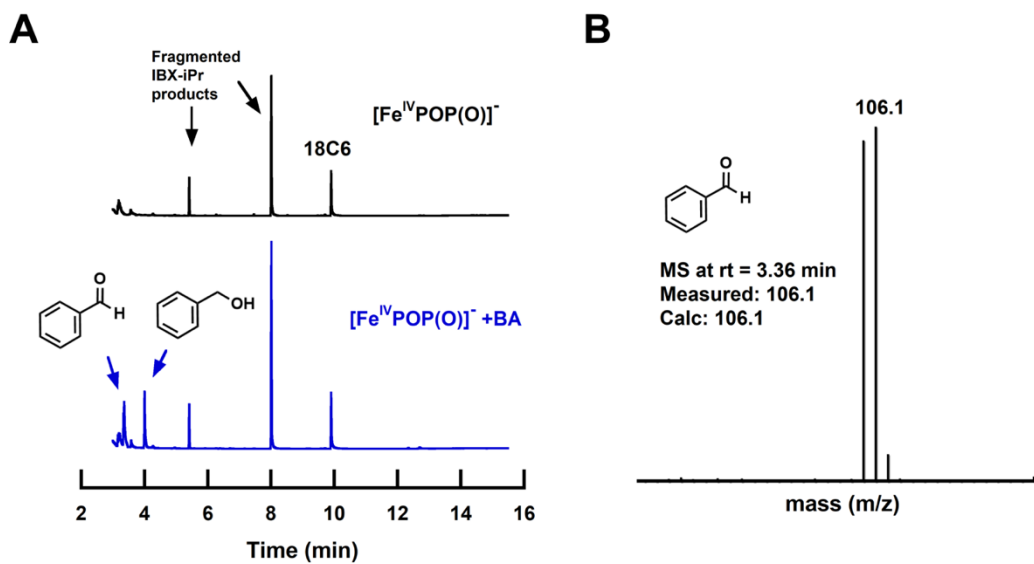

Figure S6. (A) Gas chromatograph of the organic products from the reaction of  $[\text{Fe}^{\text{IV}}\text{pop}(\text{O})]^-$  with BzOH (1:1) and (B) the corresponding mass spectrum at retention time (rt) 3.36 min in  $\text{CH}_2\text{Cl}_2$ .

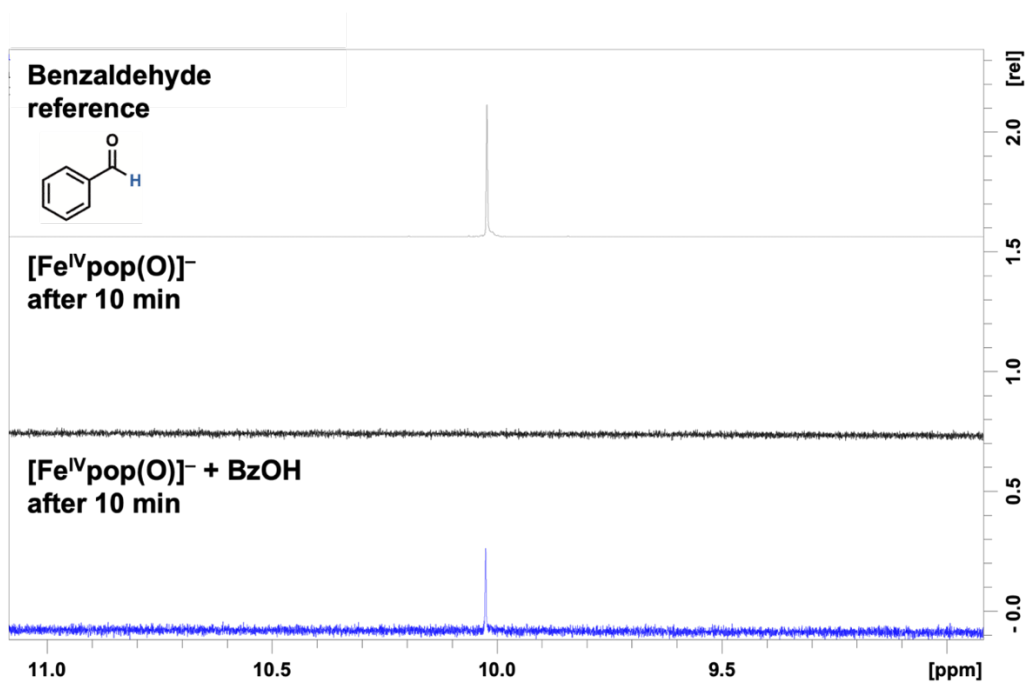

Figure S7. <sup>1</sup>H NMR spectrum in *d*<sub>6</sub>-DMSO of an authentic sample of benzaldehyde (grey), the extracted organic product from the reaction of [Fe<sup>IV</sup>pop(O)]<sup>-</sup> without BzOH (black), and the extracted organic product from the reaction of [Fe<sup>IV</sup>pop(O)]<sup>-</sup> with BzOH (1:1) (blue).

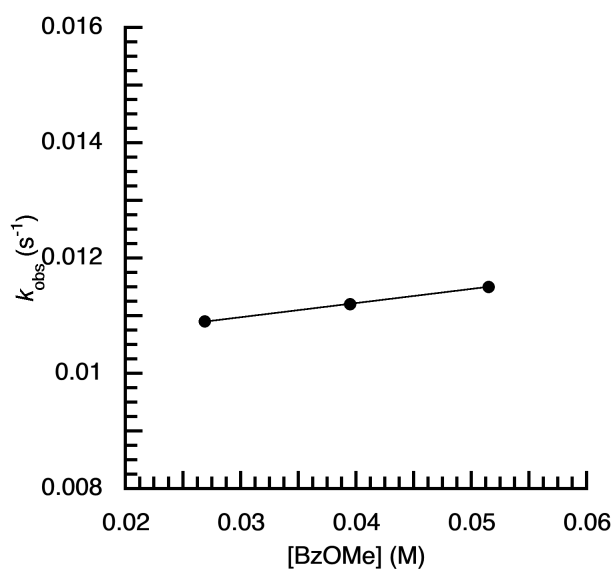

Figure S8. Plot of  $k_{\text{obs}}$  vs. the concentration of BzOMe in DMF at  $-20^\circ\text{C}$ .

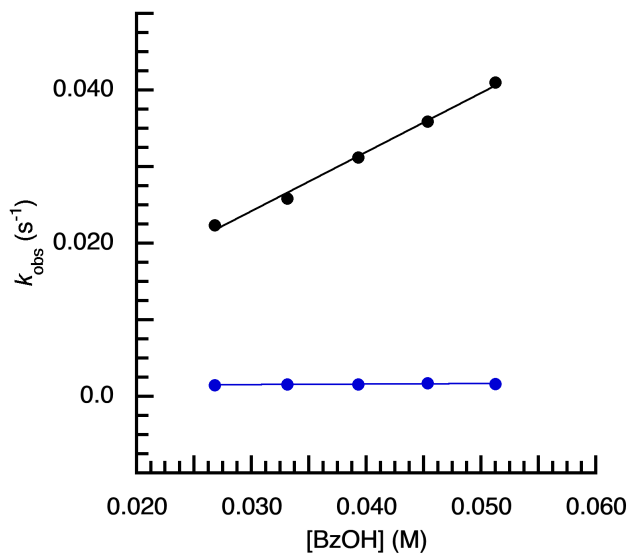

Figure S9. Plot of  $k_{\text{obs}}$  vs. the concentration of BzOH in DMF at  $-20\text{ }^{\circ}\text{C}$  using either  $[\text{Fe}^{\text{IV}}\text{pop}(\text{O})]^-$  (black) or  $[\text{Fe}^{\text{IV}}\text{pop}(\text{O})]^-$  or  $[\text{Fe}^{\text{IV}}\text{poat}(\text{O})]^-$  (blue) as the oxidant.

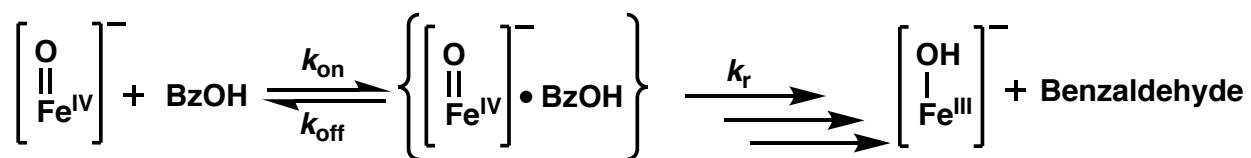

Scheme S1. Expression for the proposed pre-equilibrium between the  $\text{Fe}^{\text{IV}}$ -oxido complex and substrate.

Table S1. Second order rate constants ( $k$ ) and the corresponding substituent constant ( $\sigma$ ) for each respective *para*-substituted benzyl alcohol.

| <b>R</b> | <b><math>k</math> (M<sup>-1</sup>s<sup>-1</sup>)</b> | <b><math>\sigma</math></b> |
|----------|------------------------------------------------------|----------------------------|
| OMe      | 0.100                                                | -0.27                      |
| Me       | 0.127                                                | -0.17                      |
| H        | 0.193                                                | 0                          |
| Cl       | 0.314                                                | 0.23                       |
| CHO      | 0.495                                                | 0.42                       |

Table S2. Crystallographic Information for {K[Fe<sup>II</sup>pop(OH<sub>2</sub>)]}<sub>2</sub>

| <b>Complex</b>                               | <b>{K[Fe<sup>II</sup>pop(OH<sub>2</sub>)]}</b>                                                               |
|----------------------------------------------|--------------------------------------------------------------------------------------------------------------|
| Empirical Formula                            | C <sub>84</sub> H <sub>86</sub> Fe <sub>2</sub> K <sub>2</sub> N <sub>8</sub> O <sub>20</sub> P <sub>6</sub> |
| Fw                                           | 1903.32                                                                                                      |
| T (K)                                        | 133(2)                                                                                                       |
| Crystal System                               | Triclinic                                                                                                    |
| Space Group                                  | $P\bar{1}$                                                                                                   |
| a (Å)                                        | 14.427(3)                                                                                                    |
| b (Å)                                        | 16.428(3)                                                                                                    |
| c (Å)                                        | 20.699(4)                                                                                                    |
| $\alpha$ (°)                                 | 99.145(2)                                                                                                    |
| $\beta$ (°)                                  | 98.055(2)                                                                                                    |
| $\gamma$ (°)                                 | 111.423(2)                                                                                                   |
| V (Å <sup>3</sup> )                          | 4402.8(13)                                                                                                   |
| Z                                            | 2                                                                                                            |
| $\delta_{\text{calcd}}$ (Mg/m <sup>3</sup> ) | 1.436                                                                                                        |
| GOF on F <sup>2</sup>                        | 1.038                                                                                                        |
| R1                                           | 0.0392                                                                                                       |
| wR2                                          | 0.1080                                                                                                       |
